# Supplementary material
Source: PubMed Central journal article supplement (PMC2290746)

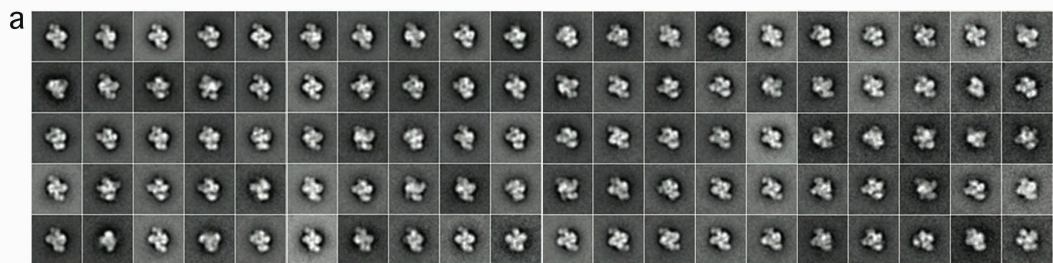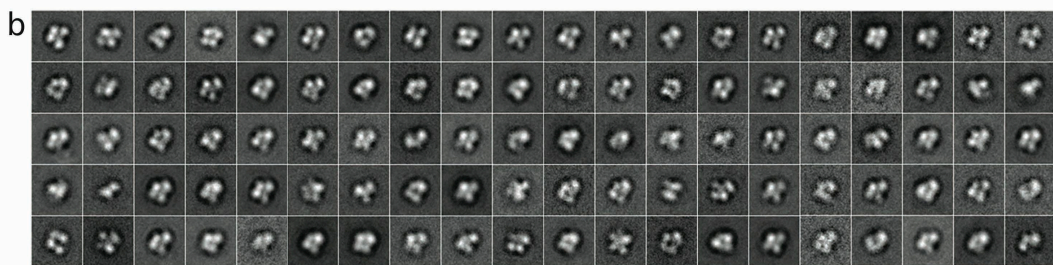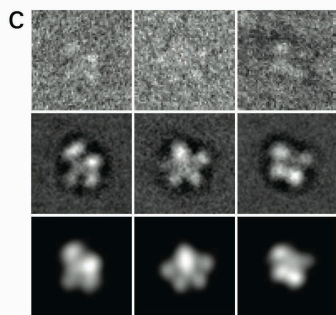

Supplement: pnas_0800867105_1.pdf [file pnas_0800867105_1.pdf]

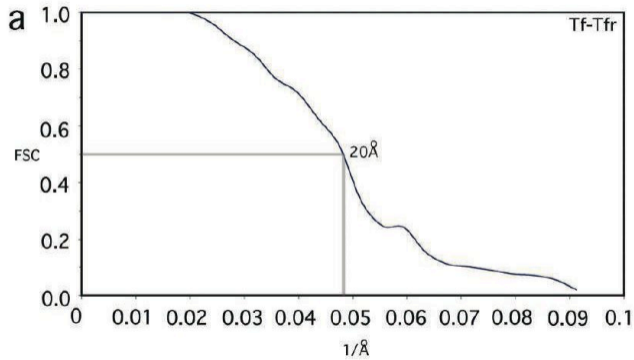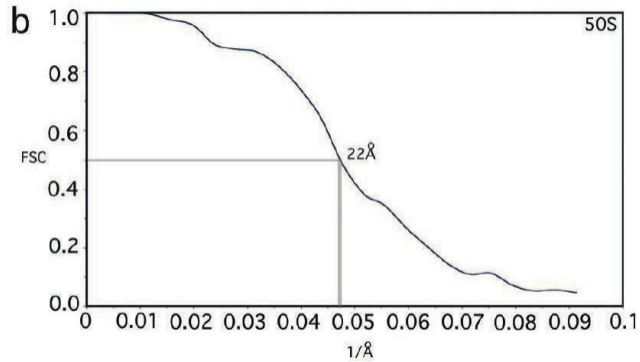

Supplement: pnas_0800867105_3.pdf [file pnas_0800867105_3.pdf]
